# Supplementary material for: Interplay of Anisotropic Exchange Interactions and Single-Ion Anisotropy in Single-Chain Magnets Built from Ru/Os Cyanidometallates(III) and Mn(III) Complex
Source: MDPI journal article supplement (doi:10.3390/molecules28031516), 2023-02-03
Supplement: s1 [file s1]

## Supporting Information

### Interplay of Anisotropic Exchange Interactions and Single-Ion Anisotropy in Single-Chain Magnets Built from Ru/Os Cyanidometallates(III) and Mn(III) Complex

Vladimir S. Mironov <sup>3\*</sup>, Eugenia V. Peresypkina <sup>2</sup> and Kira E. Vostrikova <sup>1\*</sup>

**Table S1.** Experimental details for **1**.

| Crystal data                                                                                                   |                                                                                         |
|----------------------------------------------------------------------------------------------------------------|-----------------------------------------------------------------------------------------|
| Chemical formula                                                                                               | C <sub>28</sub> H <sub>28</sub> MnN <sub>10</sub> O <sub>2</sub> Os·4(H <sub>2</sub> O) |
| CCDC Code                                                                                                      | CCDC-1958305                                                                            |
| <i>M</i> <sub>r</sub>                                                                                          | 853.81                                                                                  |
| Crystal system, space group                                                                                    | Monoclinic, <i>C2/c</i>                                                                 |
| Temperature (K)                                                                                                | 123                                                                                     |
| <i>a</i> , <i>b</i> , <i>c</i> (Å)                                                                             | 11.25103 (11), 16.77467 (15), 18.60785 (18)                                             |
| β (°), <i>V</i> (Å <sup>3</sup> ), <i>Z</i>                                                                    | 96.5256 (9), 3489.15 (6), 4                                                             |
| <i>F</i> (000), <i>D</i> <sub>x</sub> (Mg m <sup>-3</sup> )                                                    | 1692, 1.625                                                                             |
| Radiation type                                                                                                 | Cu <i>K</i> α                                                                           |
| μ (mm <sup>-1</sup> )                                                                                          | 10.17                                                                                   |
| Crystal size (mm)                                                                                              | 0.41 × 0.25 × 0.20                                                                      |
| Data collection                                                                                                |                                                                                         |
| Diffractometer                                                                                                 | Xcalibur, Atlas <sup>S2</sup> , Gemini ultra                                            |
| Absorption correction                                                                                          | Multi-scan                                                                              |
| <i>T</i> <sub>min</sub> , <i>T</i> <sub>max</sub>                                                              | 0.083, 1.000                                                                            |
| No. of measured, independent and observed [ <i>I</i> > 2σ( <i>I</i> )] reflections                             | 54476, 3098, 2915                                                                       |
| <i>R</i> <sub>int</sub>                                                                                        | 0.051                                                                                   |
| (sin θ/λ) <sub>max</sub> (Å <sup>-1</sup> )                                                                    | 0.596                                                                                   |
| Range of <i>h</i> , <i>k</i> , <i>l</i>                                                                        | <i>h</i> = -13→13, <i>k</i> = -19→19, <i>l</i> = -22→22                                 |
| Refinement                                                                                                     |                                                                                         |
| <i>R</i> [ <i>F</i> <sup>2</sup> > 2σ( <i>F</i> <sup>2</sup> )], <i>wR</i> ( <i>F</i> <sup>2</sup> ), <i>S</i> | 0.029, 0.080, 1.15                                                                      |
| No. of reflections, No. of parameters, No. of restraints                                                       | 3098, 231, 1                                                                            |
| H-atom treatment                                                                                               | H atoms treated by a mixture of independent and constrained refinement                  |
| Δ <sub>max</sub> , Δ <sub>min</sub> (e Å <sup>-3</sup> )                                                       | 1.69, -0.74                                                                             |

**Table S2.** Selected geometric parameters (Å,°).

|                                      |            |                                       |             |
|--------------------------------------|------------|---------------------------------------|-------------|
| Os1—C1 <sup>b</sup>                  | 2.050 (4)  | N11—C10                               | 1.284 (5)   |
| Os1—C1                               | 2.050 (4)  | N11—C22                               | 1.476 (5)   |
| Os1—C2                               | 2.060 (4)  | N12—C20                               | 1.483 (5)   |
| Os1—C2 <sup>b</sup>                  | 2.060 (4)  | N12—C19                               | 1.484 (6)   |
| Os1—C3                               | 2.064 (4)  | N12—C18                               | 1.497 (6)   |
| Os1—C3 <sup>b</sup>                  | 2.064 (4)  | N12—C17                               | 1.519 (5)   |
| C1—N1                                | 1.158 (5)  | C10—C11                               | 1.450 (5)   |
| C3—N3                                | 1.154 (5)  | C11—C12                               | 1.403 (5)   |
| C2—N2                                | 1.150 (5)  | C11—C16                               | 1.423 (5)   |
| N1—Mn1                               | 2.281 (3)  | C12—C13                               | 1.371 (6)   |
| Mn1—O1 <sup>a</sup>                  | 1.884 (2)  | C13—C14                               | 1.409 (5)   |
| Mn1—O1                               | 1.884 (2)  | C13—C17                               | 1.499 (5)   |
| Mn1—N11 <sup>a</sup>                 | 1.981 (3)  | C14—C15                               | 1.378 (5)   |
| Mn1—N11                              | 1.982 (3)  | C15—C16                               | 1.403 (5)   |
| Mn1—N1 <sup>a</sup>                  | 2.281 (3)  | C22—C22 <sup>a</sup>                  | 1.519 (8)   |
| O1—C16                               | 1.321 (4)  |                                       |             |
| C1 <sup>b</sup> —Os1—C1              | 180.0      | O1—Mn1—N1 <sup>a</sup>                | 94.84 (10)  |
| C1 <sup>b</sup> —Os1—C2              | 92.93 (14) | N11 <sup>a</sup> —Mn1—N1 <sup>a</sup> | 86.08 (11)  |
| C1—Os1—C2                            | 87.08 (14) | N11—Mn1—N1 <sup>a</sup>               | 89.00 (11)  |
| C1 <sup>b</sup> —Os1—C2 <sup>b</sup> | 87.07 (14) | N1—Mn1—N1 <sup>a</sup>                | 173.47 (15) |

|                                       |             |                          |           |
|---------------------------------------|-------------|--------------------------|-----------|
| C1—Os1—C2 <sup>b</sup>                | 92.92 (14)  | C16—O1—Mn1               | 125.8 (2) |
| C2—Os1—C2 <sup>b</sup>                | 180.00 (19) | C10—N11—C22              | 120.9 (3) |
| C1 <sup>b</sup> —Os1—C3               | 91.00 (13)  | C10—N11—Mn1              | 125.6 (2) |
| C1—Os1—C3                             | 89.00 (13)  | C22—N11—Mn1              | 113.3 (2) |
| C2—Os1—C3                             | 90.12 (14)  | C20—N12—C19              | 109.6 (4) |
| C2 <sup>b</sup> —Os1—C3               | 89.88 (14)  | C20—N12—C18              | 108.0 (4) |
| C1 <sup>b</sup> —Os1—C3 <sup>b</sup>  | 89.00 (13)  | C19—N12—C18              | 111.2 (4) |
| C1—Os1—C3 <sup>b</sup>                | 91.00 (13)  | C20—N12—C17              | 110.9 (3) |
| C2—Os1—C3 <sup>b</sup>                | 89.88 (14)  | C19—N12—C17              | 111.5 (3) |
| C2 <sup>b</sup> —Os1—C3 <sup>b</sup>  | 90.12 (14)  | C18—N12—C17              | 105.6 (3) |
| C3—Os1—C3 <sup>b</sup>                | 180.00 (15) | N11—C10—C11              | 124.0 (3) |
| N1—C1—Os1                             | 175.1 (3)   | C12—C11—C16              | 119.5 (3) |
| N3—C3—Os1                             | 178.8 (3)   | C12—C11—C10              | 117.3 (3) |
| N2—C2—Os1                             | 175.0 (4)   | C16—C11—C10              | 123.2 (3) |
| C1—N1—Mn1                             | 142.5 (3)   | C13—C12—C11              | 121.9 (3) |
| O1 <sup>a</sup> —Mn1—O1               | 93.88 (14)  | C12—C13—C14              | 118.5 (3) |
| O1 <sup>a</sup> —Mn1—N11 <sup>a</sup> | 91.96 (11)  | C12—C13—C17              | 121.0 (3) |
| O1—Mn1—N11 <sup>a</sup>               | 174.10 (11) | C14—C13—C17              | 120.3 (3) |
| O1 <sup>a</sup> —Mn1—N11              | 174.10 (11) | C15—C14—C13              | 121.0 (3) |
| O1—Mn1—N11                            | 91.96 (11)  | C14—C15—C16              | 121.2 (3) |
| N11 <sup>a</sup> —Mn1—N11             | 82.22 (17)  | O1—C16—C15               | 118.5 (3) |
| O1 <sup>a</sup> —Mn1—N1               | 94.84 (10)  | O1—C16—C11               | 123.4 (3) |
| O1—Mn1—N1                             | 89.62 (11)  | C15—C16—C11              | 118.0 (3) |
| N11 <sup>a</sup> —Mn1—N1              | 89.00 (11)  | C13—C17—N12              | 115.3 (3) |
| N11—Mn1—N1                            | 86.08 (11)  | N11—C22—C22 <sup>a</sup> | 106.9 (2) |
| O1 <sup>a</sup> —Mn1—N1 <sup>a</sup>  | 89.62 (11)  |                          |           |

Symmetry code(s): (a)  $-x, y, -1/2-z$ ; (b)  $-x, 1-y, -z$ .

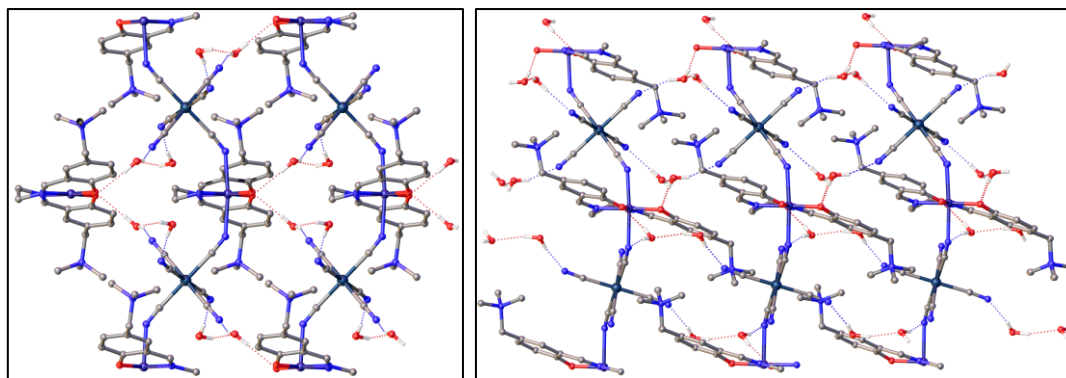

**Figure S1.** Hydrogen bonding system in **1**.

**Table S3.** Some crystallographic parameters for  $[\text{Mn}(\text{SB}^{2-})\text{M}(\text{CN})_6] \cdot 4\text{H}_2\text{O}$ .

| M   | Conditions   | Cell parameters P2/c; a, b, c (Å); $\beta^\circ$ | 2 $\theta$ | d-spacing, | h k l  |
|-----|--------------|--------------------------------------------------|------------|------------|--------|
| Fe* | SCXRD, 93 K  | 11.236, 16.741, 18.457, 96.929                   | 12.867     | 6.8745     | -1 1 2 |
| Ru  | PXRD, RT     | 11.246, 16.743, 18.569                           | 12.846     | 6.8857     | -1 1 2 |
| Os  | SCXRD, 110 K | 11.2510, 16.7747, 18.6078, 96.53                 | 12.837     | 6.8907     | -1 1 2 |

\*H. Miyasaka, T. Madanbashi, A. Saitoh, N. Motokawa, R. Ishikawa, M. Yamashita, S. Bahr, W. Wernsdorfer, R. Clérac, *Chem. Eur. J.*, 2012, **18**, 3942.

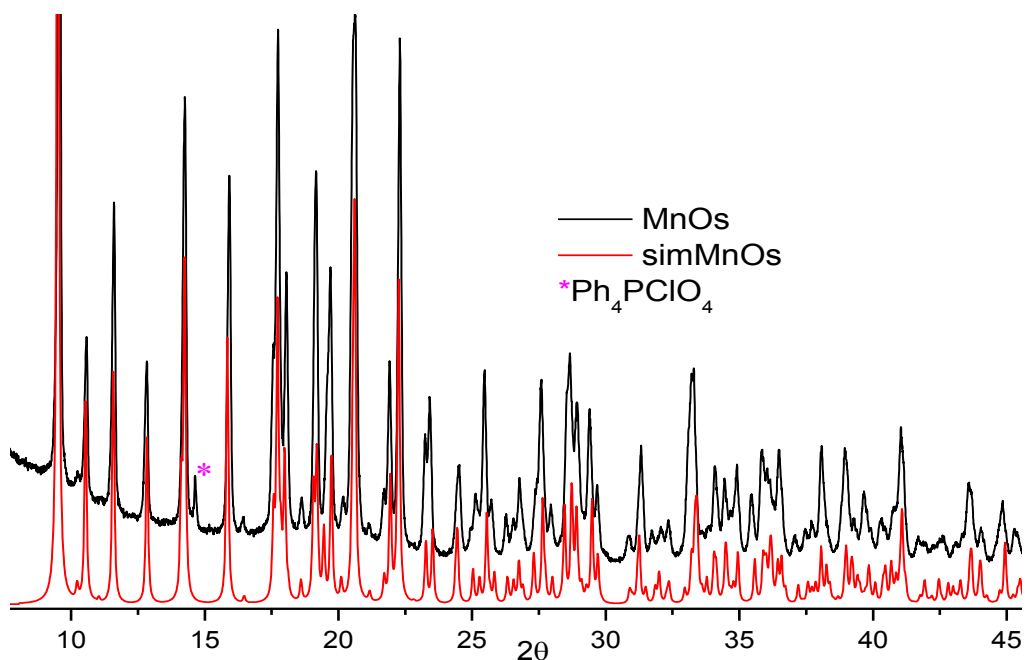

**Figure S2.** Simulated (red) and experimental X-ray powder pattern for neutral Mn-Os chain polymer.

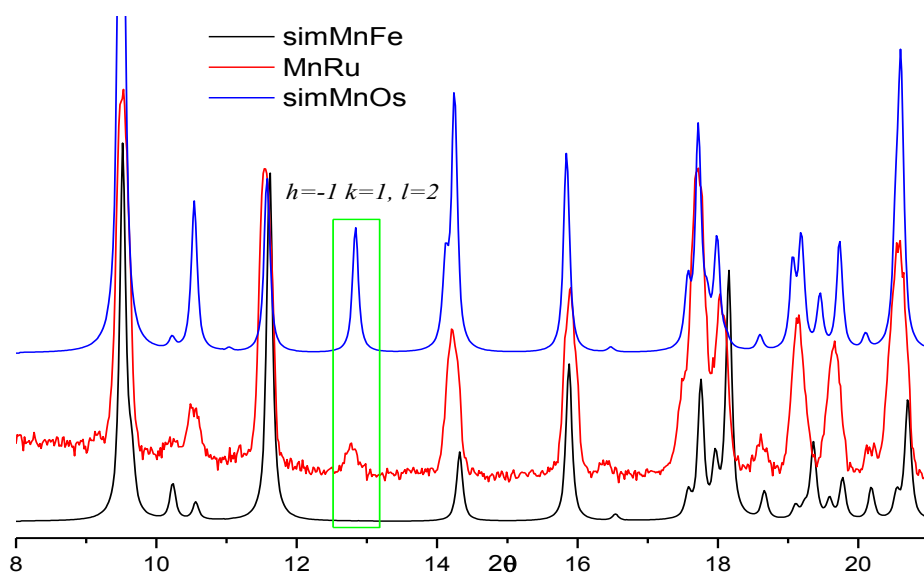

**Figure S3.** Additional reflections from  $(-1, 1, 2)$  plane consisted of metal atoms. Simulated (red) and experimental X-ray powder patterns for neutral Mn-Os chain polymer.

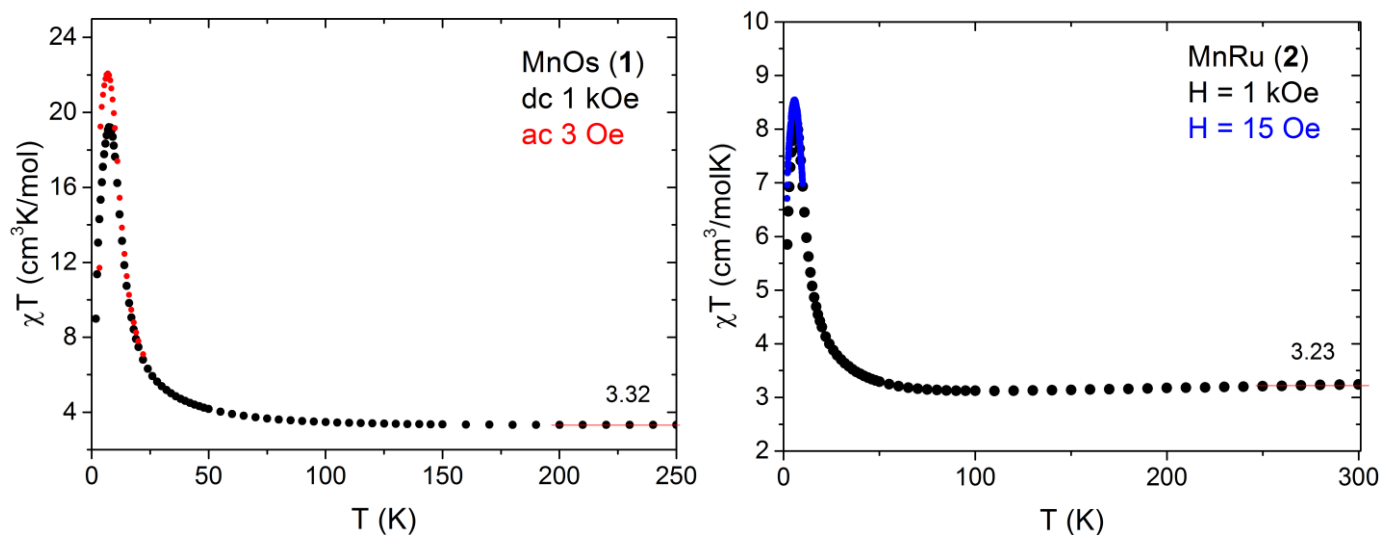

**Figure S4.** Magnetic susceptibility times temperature vs  $T$  at 1 kOe and lower fields for **1** in 3 Oe (left) and **2** in 15 Oe (right).

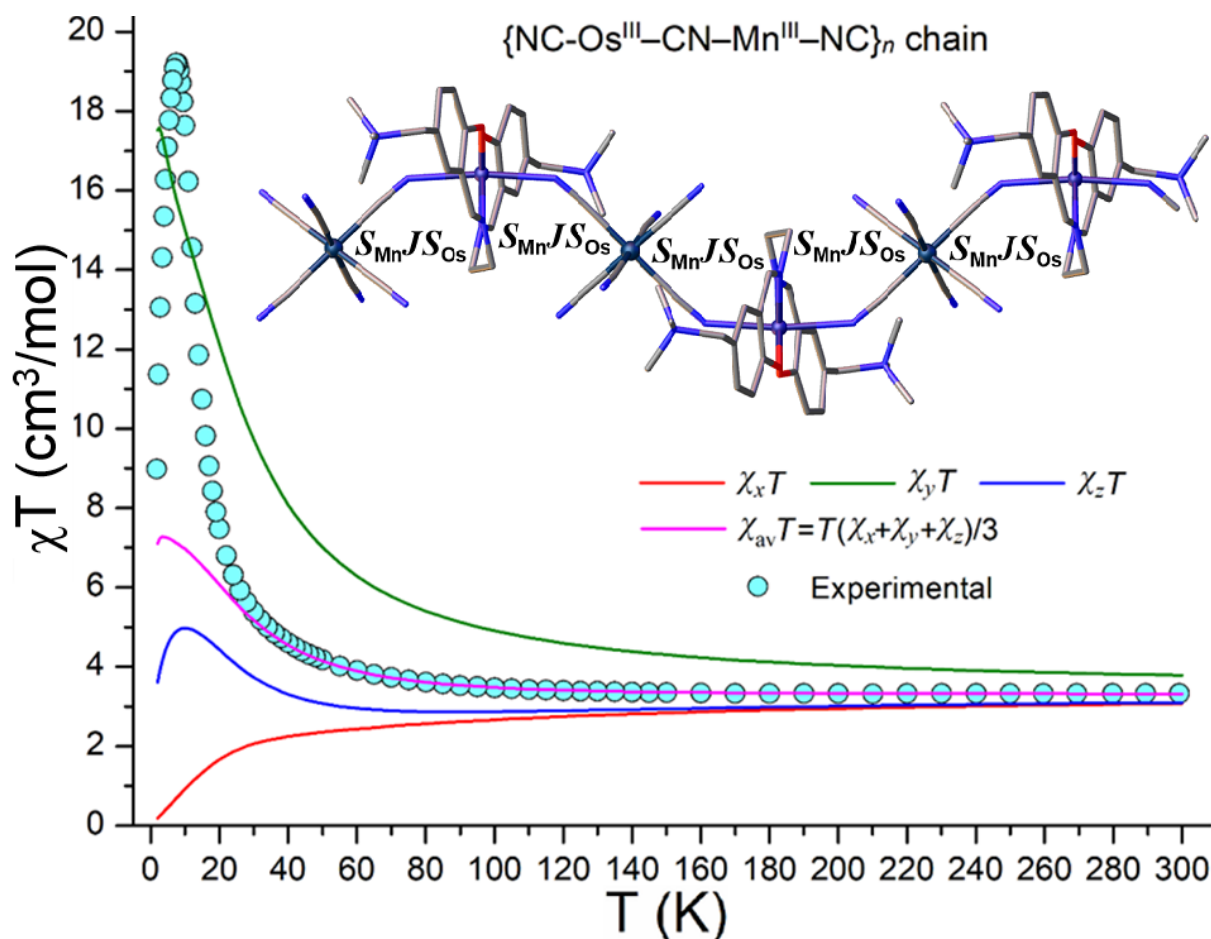

**Figure S5.** Calculated components  $\chi_x$ ,  $\chi_y$ ,  $\chi_z$  of magnetic susceptibility of the Mn-Os chain (**1**). Below 50 K magnetic susceptibility is strongly anisotropic.

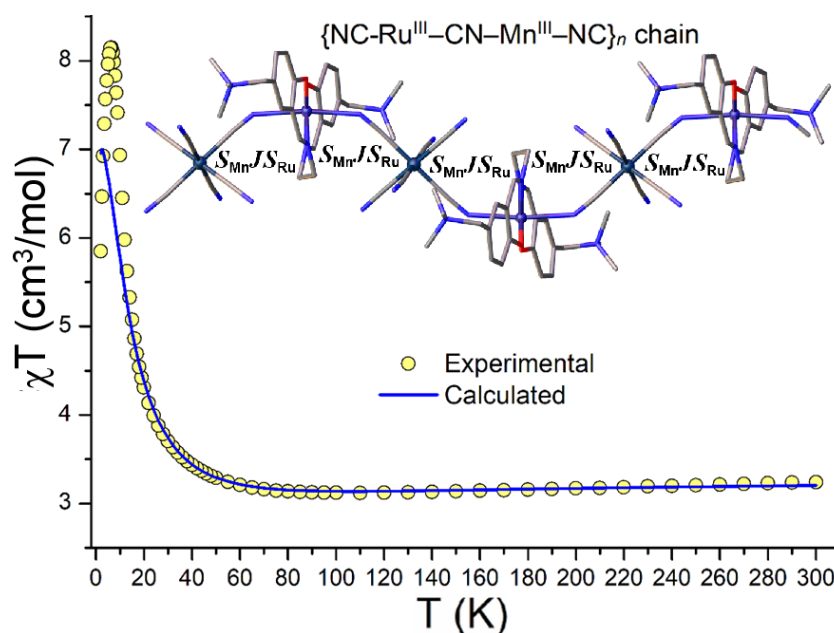

**Figure S6.** Experimental (yellow circles) and simulated (solid blue line) magnetic susceptibility  $\chi T$  of **2**. The  $\chi T$  curve was simulated with the spin Hamiltonian (Eqn. 2) involving anisotropic 3-axes spin coupling  $\mathbf{S}_{\text{Mn}}\mathbf{J}\mathbf{S}_{\text{Ru}} = -J_x S_{\text{Mn}}^x S_{\text{Ru}}^x - J_y S_{\text{Mn}}^y S_{\text{Ru}}^y - J_z S_{\text{Mn}}^z S_{\text{Ru}}^z$ . The best fit is obtained at the set of parameters  $J_x = -18$ ,  $J_y = +20$ ,  $J_z = -18$  cm<sup>-1</sup>,  $g_{\text{Mn}} = 2.00$ ,  $g_{\text{Ru}} = 1.80$ ,  $D_{\text{Mn}} = -4.0$  cm<sup>-1</sup>. Calculations are performed for a six-membered fragment  $\{\text{Mn-Ru}\}_3$  of the heterometallic chain of **2** with cyclic boundary conditions for the Mn-Ru spin coupling, as shown in the inset.

#### Calculations of magnetic susceptibility of chain compounds **1** and **2**

Magnetic susceptibility of  $\{\text{Mn}^{\text{III}}\text{-Os}^{\text{III}}\}_n$  (**1**) and  $\{\text{Mn}^{\text{III}}\text{-Ru}^{\text{III}}\}_n$  (**2**) chain compounds are calculated in terms of a spin Hamiltonian

$$\hat{H} = \sum_{\langle ij \rangle} \mathbf{S}_{\text{Os}(i)} \mathbf{J} \mathbf{S}_{\text{Mn}(j)} + \sum_j \mathbf{S}_{\text{Mn}(j)} (T_j(\theta) \mathbf{D}_j T_j(\theta)^{-1}) \mathbf{S}_{\text{Mn}(j)} + \mu_B g_{\text{Mn}} \mathbf{H} \sum_j \mathbf{S}_{\text{Mn}(j)} + \mu_B g_{\text{Os}} \mathbf{H} \sum_i \mathbf{S}_{\text{Os}(i)}, \quad (\text{S1})$$

where the sum  $\langle ij \rangle$  runs over the neighboring Os( $i$ ) and Mn( $j$ ) cyanide-bridged exchange-coupled ions in the chain; the tensor of anisotropic spin coupling ( $\mathbf{J}$ ) has a three-axes structure,  $\mathbf{S}_{\text{Mn}}\mathbf{J}\mathbf{S}_{\text{Os}} = -J_x S_{\text{Mn}}^x S_{\text{Os}}^x - J_y S_{\text{Mn}}^y S_{\text{Os}}^y - J_z S_{\text{Mn}}^z S_{\text{Os}}^z$ . The ZFS  $\mathbf{D}_j$  tensors of the Mn<sup>III</sup>( $i$ ) ions are supposed to have the axial structure (with  $D < 0$  and  $E = 0$ ). Each  $\mathbf{D}_j$  tensor of Mn<sup>III</sup>( $i$ ) ion is transformed by the  $T_j(\theta)$  rotation matrix,  $\mathbf{D}_j' = T_j(\theta)\mathbf{D}_jT_j(\theta)^{-1}$ , specifying the non-collinear orientation ( $\theta = \pm 37.5^\circ$ ) of these ZFS tensors in the bent structure of the  $\{\text{Mn-Os}\}_n$  chain with respect to the local spin quantization axis  $z$  of the anisotropic exchange spin Hamiltonian  $\mathbf{S}_{\text{Mn}}\mathbf{J}\mathbf{S}_{\text{Os}}$  (see inset in Figure 4). The components  $M_\alpha$  ( $\alpha = x, y, z$ ) of the magnetic moment  $\mathbf{M}$  of vanadium complexes in an external magnetic field  $\mathbf{H}$  are obtained from the conventional

$$\text{equation } M_\alpha = Nk_B T \frac{\partial \ln Z(\mathbf{H})}{\partial H_\alpha}, \quad (\text{S2}),$$

$$\text{where } Z(\mathbf{H}) \text{ is the partition function } Z(\mathbf{H}) = \sum_i \exp(-E_i(\mathbf{H})/k_B T), \quad (\text{S3})$$

with  $E_i(\mathbf{H})$  being the energy of the  $i$ -th electronic state of the chain in the magnetic field  $\mathbf{H}$  obtained from diagonalization of the spin Hamiltonian (S1). Then the diagonal component  $\chi_{aa}$  of the tensor of magnetic susceptibility is written as  $\chi_{aa} = M_\alpha/H_\alpha$ ; magnetic susceptibility of the powder sample is given by  $\chi = (\chi_{xx} + \chi_{yy} + \chi_{zz})/3$ . Calculations are performed at the experimental applied magnetic field of  $H = 1$  kOe. With this approach, the temperature dependence of magnetic susceptibility  $\chi T$  of compounds **1** and **2** was calculated (Figures 4, S6 and S7).

**Table S4.** Cole-Cole fits parameters for **1**.

| $T$ (K) | $\tau$ (s) | $\Delta\tau$ (s) | $\alpha$ | $\Delta\alpha$ | $X_0$ (cm <sup>3</sup> K/mol) | $\Delta X_0$ (cm <sup>3</sup> K/mol) | $X_\infty$ (cm <sup>3</sup> K/mol) | $\Delta X_\infty$ (cm <sup>3</sup> K/mol) |
|---------|------------|------------------|----------|----------------|-------------------------------|--------------------------------------|------------------------------------|-------------------------------------------|
| 2.80    | 8.41       | 0.43             | 0.4733   | 0.0026         | 7.70                          | 0.13                                 | 0.1635                             | 0.0022                                    |
| 2.95    | 2.359      | 0.060            | 0.4453   | 0.0023         | 7.283                         | 0.061                                | 0.1657                             | 0.0029                                    |
| 3.10    | 0.629      | 0.015            | 0.3986   | 0.0039         | 6.527                         | 0.052                                | 0.1843                             | 0.0070                                    |
| 3.25    | 0.2026     | 0.0037           | 0.3537   | 0.0049         | 6.044                         | 0.037                                | 0.205                              | 0.011                                     |
| 3.45    | 0.05532    | 0.00089          | 0.3047   | 0.0059         | 5.635                         | 0.027                                | 0.225                              | 0.016                                     |
| 3.65    | 0.01778    | 0.00026          | 0.2664   | 0.0060         | 5.344                         | 0.019                                | 0.247                              | 0.018                                     |
| 3.85    | 0.006320   | 0.000087         | 0.2368   | 0.0058         | 5.116                         | 0.014                                | 0.264                              | 0.020                                     |
| 4.10    | 0.002010   | 0.000029         | 0.2056   | 0.0062         | 4.874                         | 0.011                                | 0.290                              | 0.026                                     |
| 4.30    | 0.000885   | 0.000013         | 0.1846   | 0.0062         | 4.7015                        | 0.0089                               | 0.319                              | 0.031                                     |
| 4.65    | 0.0002622  | 0.0000048        | 0.1356   | 0.0061         | 4.4283                        | 0.0051                               | 0.524                              | 0.042                                     |
| 5.00    | 0.0000938  | 0.0000025        | 0.0894   | 0.0053         | 4.1884                        | 0.0021                               | 0.780                              | 0.061                                     |

**Table S5.** Cole-Cole fits parameters for **2**.

| $T$ (K) | $\tau$ (s) | $\Delta\tau$ (s) | $\alpha$ | $\Delta\alpha$ | $X_0$ (cm <sup>3</sup> K/mol) | $\Delta X_0$ (cm <sup>3</sup> K/mol) | $X_\infty$ (cm <sup>3</sup> K/mol) | $\Delta X_\infty$ (cm <sup>3</sup> K/mol) |
|---------|------------|------------------|----------|----------------|-------------------------------|--------------------------------------|------------------------------------|-------------------------------------------|
| 2.60    | 0.1742     | 0.0061           | 0.5839   | 0.0042         | 3.461                         | 0.028                                | 0.1363                             | 0.0083                                    |
| 2.80    | 0.0361     | 0.0015           | 0.5215   | 0.0087         | 3.064                         | 0.028                                | 0.190                              | 0.019                                     |
| 3.00    | 0.01016    | 0.00043          | 0.449    | 0.012          | 2.774                         | 0.021                                | 0.267                              | 0.026                                     |
| 3.20    | 0.00348    | 0.00016          | 0.388    | 0.013          | 2.574                         | 0.015                                | 0.325                              | 0.030                                     |
| 3.40    | 0.001400   | 0.000058         | 0.326    | 0.012          | 2.4153                        | 0.0096                               | 0.401                              | 0.030                                     |
| 3.60    | 0.000631   | 0.000024         | 0.266    | 0.012          | 2.2844                        | 0.0062                               | 0.482                              | 0.029                                     |
| 3.80    | 0.000303   | 0.000011         | 0.213    | 0.011          | 2.1713                        | 0.0039                               | 0.558                              | 0.031                                     |
| 4.00    | 0.0001576  | 0.0000067        | 0.162    | 0.010          | 2.0693                        | 0.0024                               | 0.635                              | 0.035                                     |
| 4.20    | 0.0000934  | 0.0000048        | 0.1084   | 0.0100         | 1.9801                        | 0.0014                               | 0.760                              | 0.041                                     |

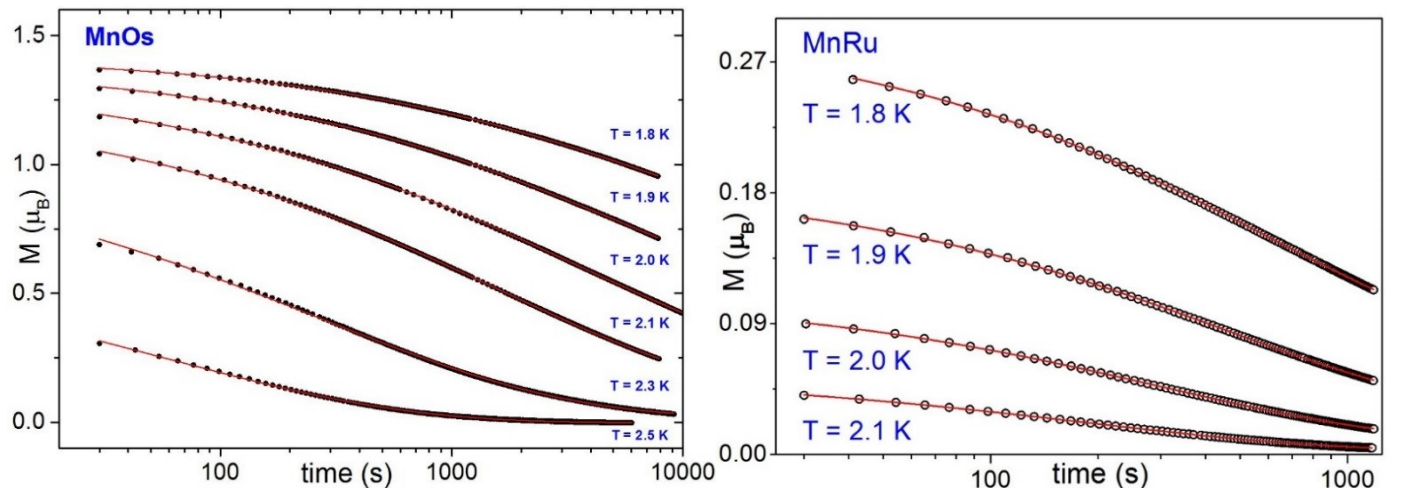

**Figure S7.** Time dependence of magnetization relaxation for **1** (left) and **2** (right) following the field change from 10 to 0 kOe, at constant temperatures  $1.8 \div 2.5$  K. The data were fitted using a stretched exponential decay:  $M(t) = M_0 \exp[-(t/\tau)^{1-n}]$ . Only data for  $t > 80$  s were taken into account because it takes a finite time to switch off the field. In about 60 seconds, the field drops linearly from 20 to 0 kOe. The time when the current in the magnet reaches zero was defined as zero time in the above figures. It was confirmed by an attempt to fit a decay with the offset  $(t - t_0)$ , and values close to zero were obtained.

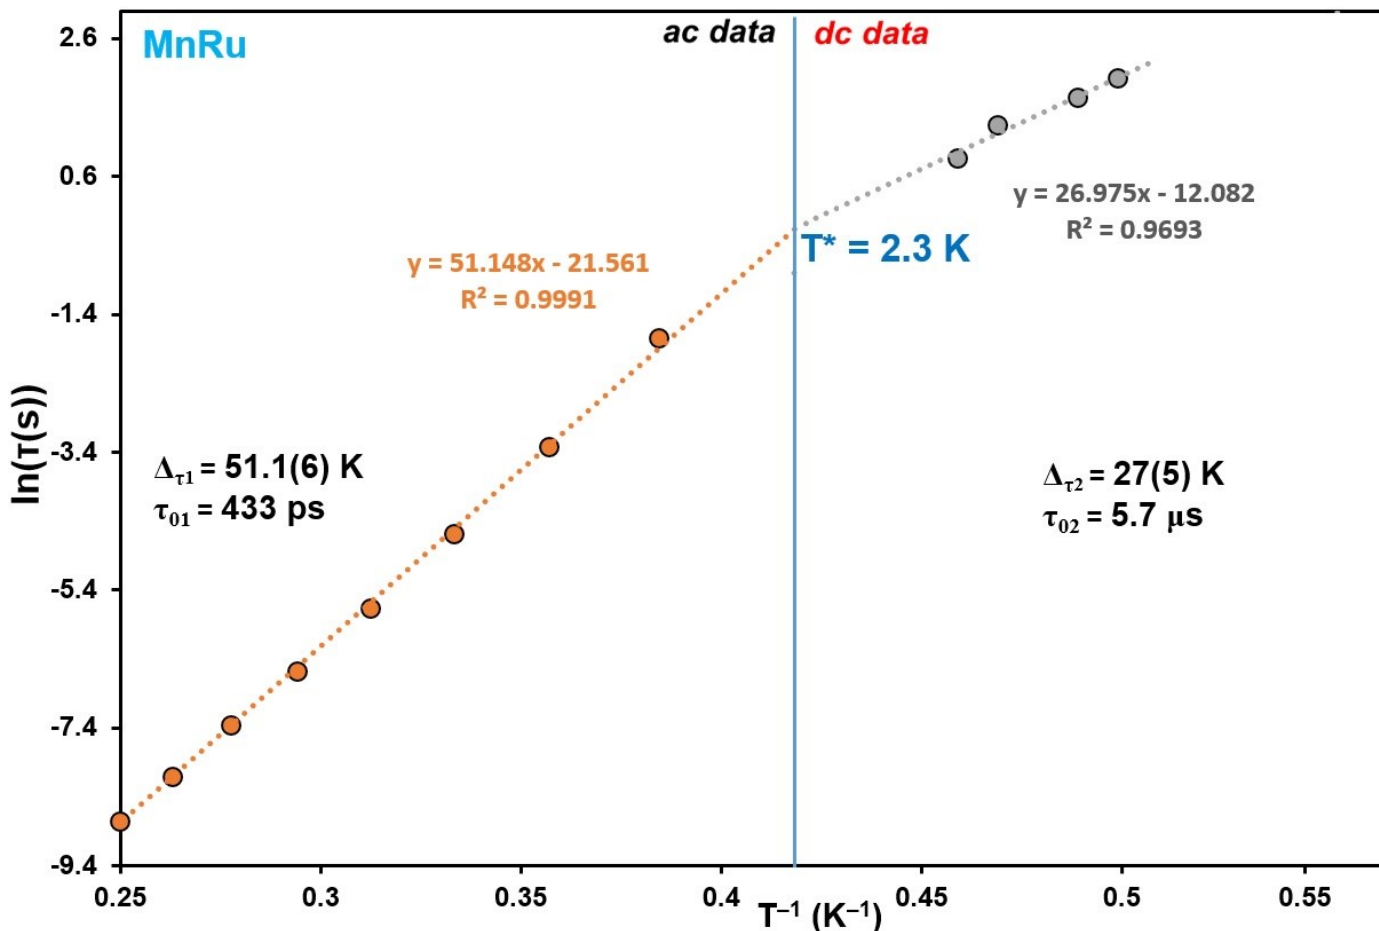

**Figure S8.** Relaxation time of **2** derived from the *ac* data (left) and time dependent *dc* magnetization (right). The dotted lines correspond to the linear fit according to the Arrhenius law:  $\tau = \tau_0 \exp(\Delta_{\tau 1}/k_B T)$ .

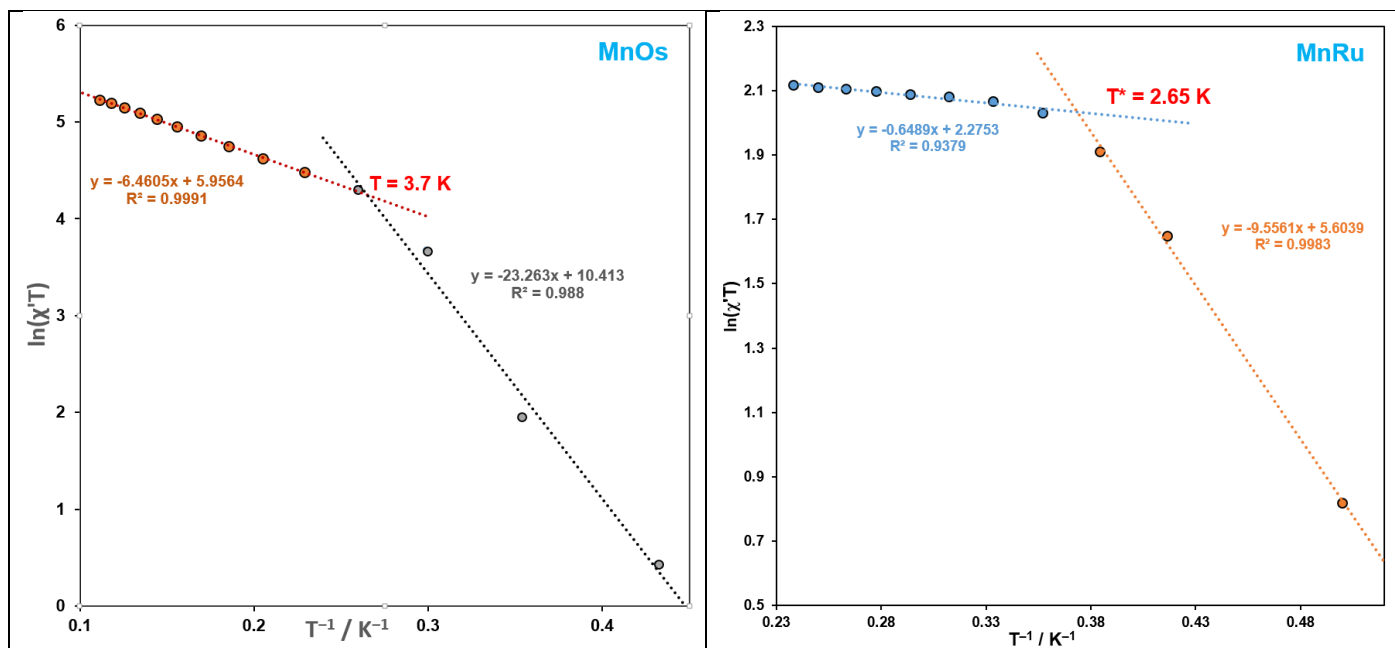

**Figure S9.** Crossover temperatures  $T^*$  obtained from the  $\ln(\chi T)$  vs  $T^{-1}$  dependencies for the susceptibility data collected at 0 *dc* and 3 Oe *ac* field at 1 Hz below 9 and 4.2 K for **1** (left) and **2** (right) respectively.

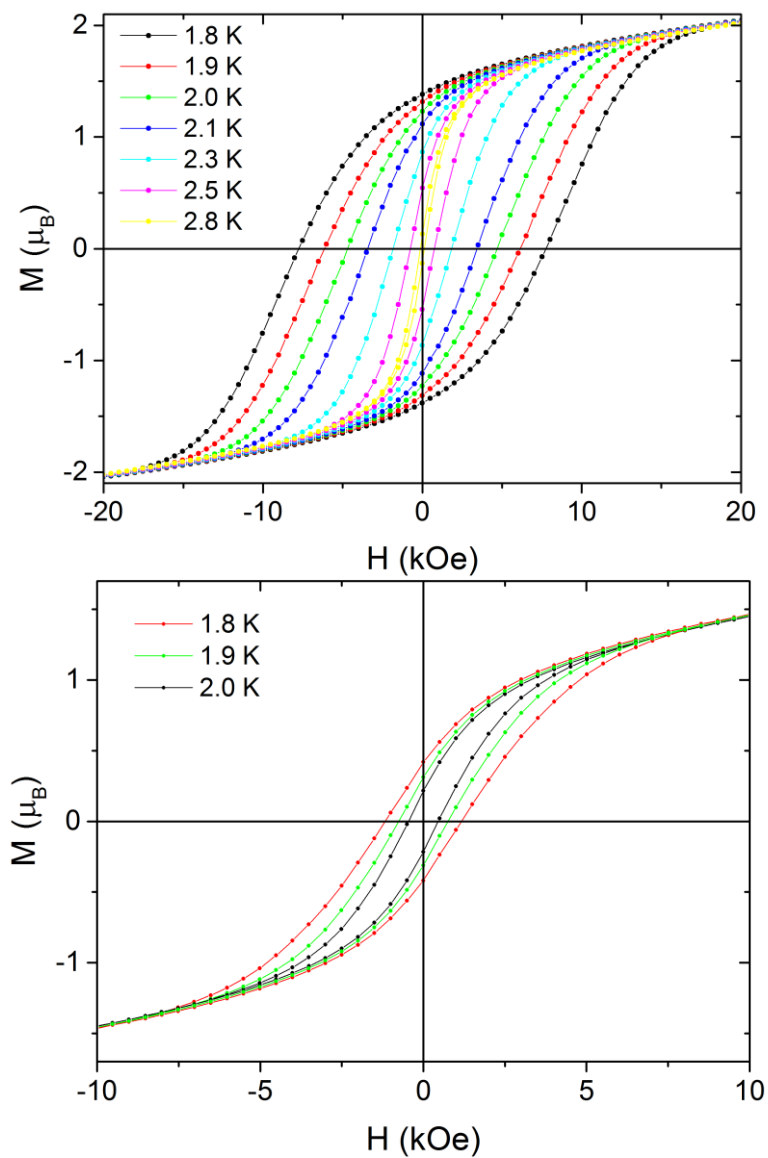

**Figure S10.** Magnetization versus field for **1** (top) and **2** (bottom) – hysteresis loops. Solid lines are to guide the eye.

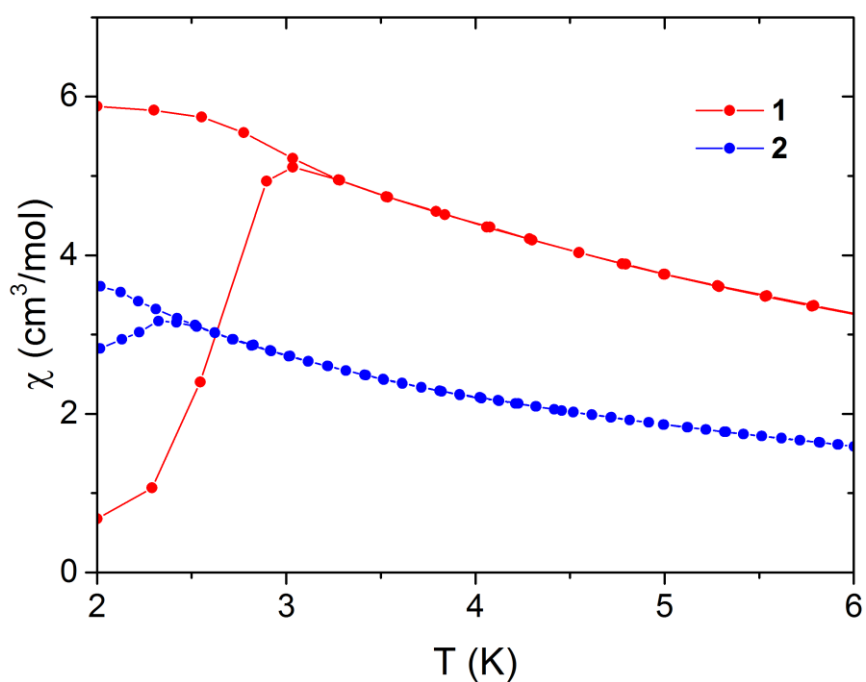

**Figure S11.** Zero-field cooling/field cooling magnetic susceptibility vs. temperature for **1** and **2** in 15 Oe with a temperature sweep rate of 0.25 K/min up to 10 K and 2 K/min at higher temperatures for **1** and **2**.

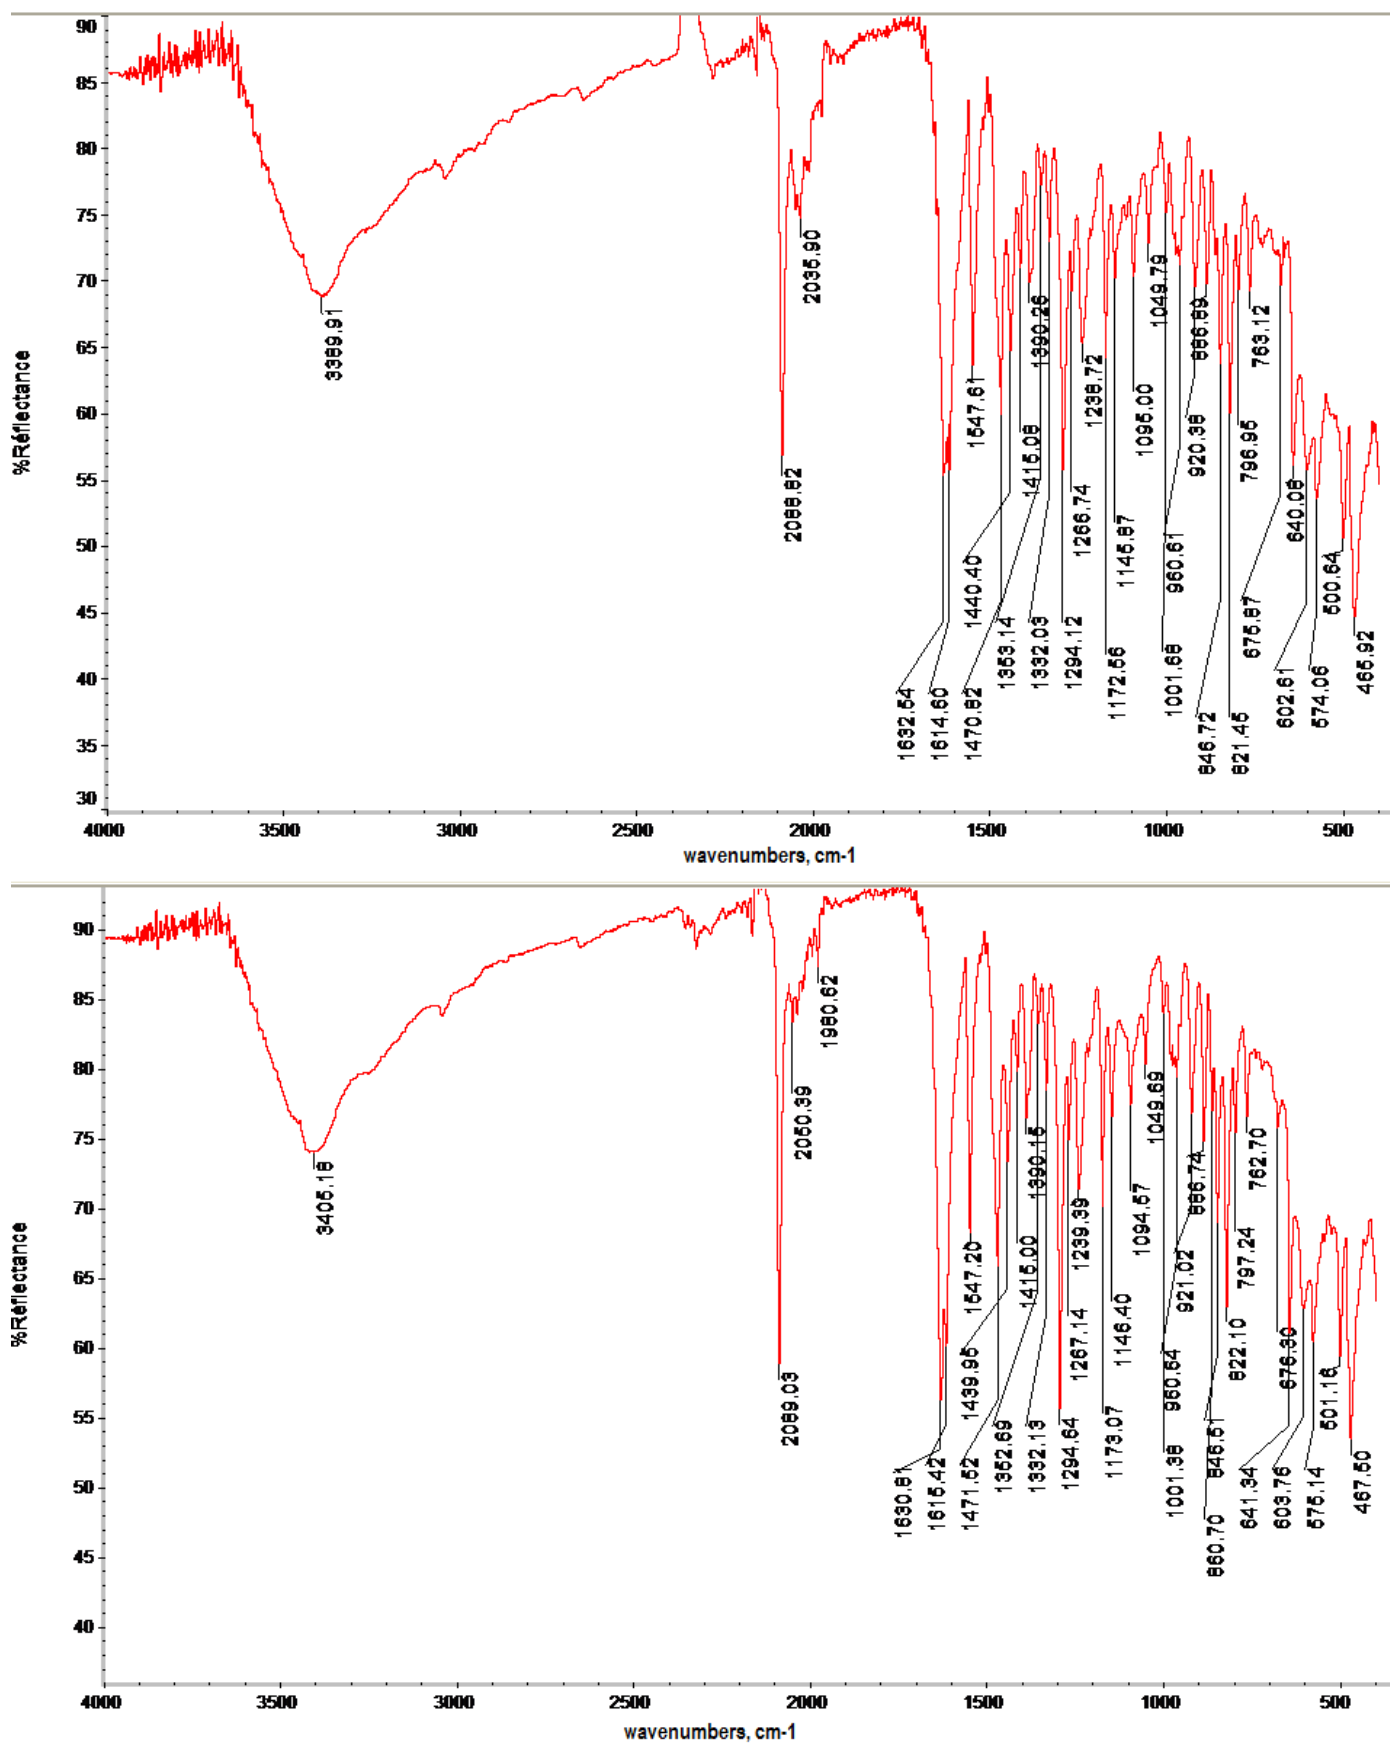

Figure S12. FTIR (ATR) spectra of 1 (top) and 2 (bottom).
